# Supplementary material for: Local structure modulation of Mn4+-doped Na2Si1−yGeyF6 red phosphors for enhancement of emission intensity, moisture resistance, thermal stability and application in warm pc-WLEDs
Source: Royal Society of Chemistry journal article supplement (doi:10.1039/d0dt02935a), 2020-01-01
Supplement: d0dt02935a1.pdf [file d0dt02935a1.pdf]

## Electronic Supplementary Information (ESI)

### Local structure modulation of Mn<sup>4+</sup>-doped Na<sub>2</sub>Si<sub>1-y</sub>Ge<sub>y</sub>F<sub>6</sub> red phosphor for enhancement of emission intensity, moisture resistant, thermal stability and application in warm pc-WLEDs

Feng Hong<sup>1,2</sup>, Ge Pang<sup>1</sup>, Lijuan Diao<sup>1</sup>, Zhendong Fu<sup>3</sup>, Guixia Liu<sup>\*1</sup>, Xiangting Dong<sup>\*1</sup>, Wensheng Yu<sup>1</sup>, Jinxian Wang<sup>1</sup>

<sup>1</sup>Key Laboratory of Applied Chemistry and Nanotechnology at Universities of Jilin Province, Changchun University of Science and Technology, Changchun 130022, China

<sup>2</sup>College of Materials Science and Engineering, Changchun University of Science and Technology, Changchun 130022, China

<sup>3</sup>Tianjin Jinhang Technical Physics Institute, Tianjin, 300070, P.R. China

\*Corresponding author. Tel.: +86-431-85383815; Tel: +86-431-85582574

E-mail address: [liuguixia22@163.com](mailto:liuguixia22@163.com); [dongxiangting888@163.com](mailto:dongxiangting888@163.com).

**Table 1** Cell parameters of Na<sub>2</sub>Si<sub>1-y</sub>Ge<sub>y</sub>F<sub>6</sub>:0.06Mn<sup>4+</sup> (y = 0, 0.3, 0.5, 0.7 and 1) red phosphors

| Samples                                                                                  | Crystalline phase | Space group | Lattice parameters |         |                     |
|------------------------------------------------------------------------------------------|-------------------|-------------|--------------------|---------|---------------------|
|                                                                                          |                   |             | a = b (Å)          | c (Å)   | V (Å <sup>3</sup> ) |
| NaSiF <sub>6</sub> (standard)                                                            | Hexagonal         | P321(150)   | 8.8659             | 5.0433  | 343.3               |
| Na <sub>2</sub> SiF <sub>6</sub> :0.06Mn <sup>4+</sup>                                   | Hexagonal         | P321(150)   | 8.8520             | 5.0374  | 341.84              |
| Na <sub>2</sub> Si <sub>0.3</sub> Ge <sub>0.7</sub> F <sub>6</sub> :0.06Mn <sup>4+</sup> | Hexagonal         | P321(150)   | 8.8801             | 5.0412  | 344.27              |
| Na <sub>2</sub> Si <sub>0.5</sub> Ge <sub>0.5</sub> F <sub>6</sub> :0.06Mn <sup>4+</sup> | Hexagonal         | P321(150)   | 8.9593             | 5.1451  | 357.67              |
| Na <sub>2</sub> Si <sub>0.7</sub> Ge <sub>0.3</sub> F <sub>6</sub> :0.06Mn <sup>4+</sup> | Hexagonal         | P321(150)   | 9.0274             | 5.0767  | 361.40              |
| Na <sub>2</sub> GeF <sub>6</sub> :0.06Mn <sup>4+</sup>                                   | Hexagonal         | P321(150)   | 9.0392             | 5.10637 | 362.33              |
| Na <sub>2</sub> GeF <sub>6</sub> (standard)                                              | Hexagonal         | P321(150)   | 9.0576             | 5.1071  | 362.9               |

**Table 2** Spectroscopic parameters and  $\beta_1$  values of Mn<sup>4+</sup> ions for as-reported Mn<sup>4+</sup>-activated fluorides and oxides phosphor.

| Host                                                               | Dq/cm <sup>-1</sup> | B/cm <sup>-1</sup> | C/cm <sup>-1</sup> | $\beta_1$ | E( <sup>2</sup> E <sub>g</sub> )/cm <sup>-1</sup> | Ref.      |
|--------------------------------------------------------------------|---------------------|--------------------|--------------------|-----------|---------------------------------------------------|-----------|
| Mg <sub>2</sub> Al <sub>4</sub> Si <sub>5</sub> O <sub>18</sub>    | 2141                | 927                | 2560               | 0.996     | 14409                                             | 1         |
| La <sub>3</sub> GaGe <sub>5</sub> O <sub>16</sub>                  | 2141                | 900                | 2858               | 1.020     | 15174                                             | 2         |
| LaTiSbO <sub>6</sub>                                               | 2062                | 876                | 2752               | 0.989     | 14641                                             | 3         |
| La <sub>0.98</sub> Lu <sub>0.02</sub> AlO <sub>3</sub>             | 2018                | 820                | 2659               | 0.940     | 13991                                             | 4         |
| Li <sub>2</sub> Ge <sub>4</sub> O <sub>9</sub>                     | 2252                | 608                | 3423               | 0.953     | 14948                                             | 5         |
| SrMg <sub>2</sub> La <sub>2</sub> W <sub>2</sub> O <sub>12</sub>   | 2088                | 746                | 2856               | 0.924     | 14124                                             | 6         |
| KZnF <sub>3</sub>                                                  | 2105                | 607                | 3785               | 1.024     | 15797                                             | 7         |
| NaHF <sub>2</sub>                                                  | 2141                | 665                | 4016               | 1.095     | 15923                                             | 8         |
| CsPF <sub>6</sub>                                                  | 2127                | 617                | 3787               | 1.028     | 16103                                             | 9         |
| K <sub>0.007</sub> Ba <sub>0.965</sub> TiF <sub>6</sub>            | 2096                | 610                | 3677               | 1.002     | 15713                                             | 10        |
| Na <sub>2</sub> Si <sub>0.5</sub> Ge <sub>0.5</sub> F <sub>6</sub> | 2137                | 556                | 3858               | 1.017     | 15898                                             | This work |

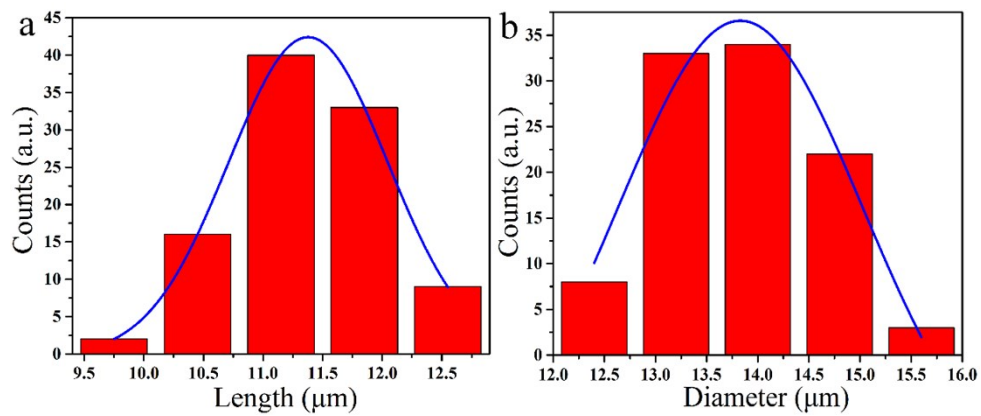

**Fig. S1** Histogram of length (a) and diameter (b) of as-prepared  $\text{Na}_2\text{SiF}_6:0.06\text{Mn}^{4+}$  red phosphor

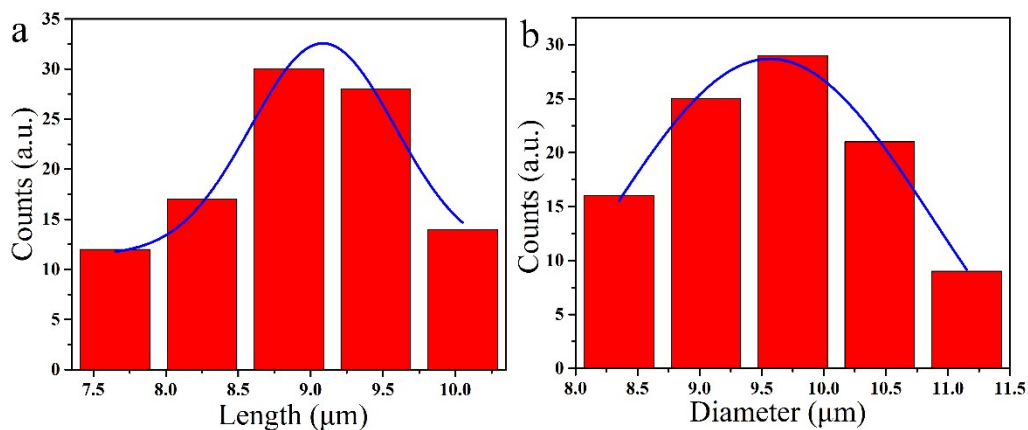

**Fig. S2** Histogram of length (a) and diameter (b) of as-prepared  $\text{Na}_2\text{Si}_{0.7}\text{Ge}_{0.3}\text{F}_6:0.06\text{Mn}^{4+}$  red phosphor

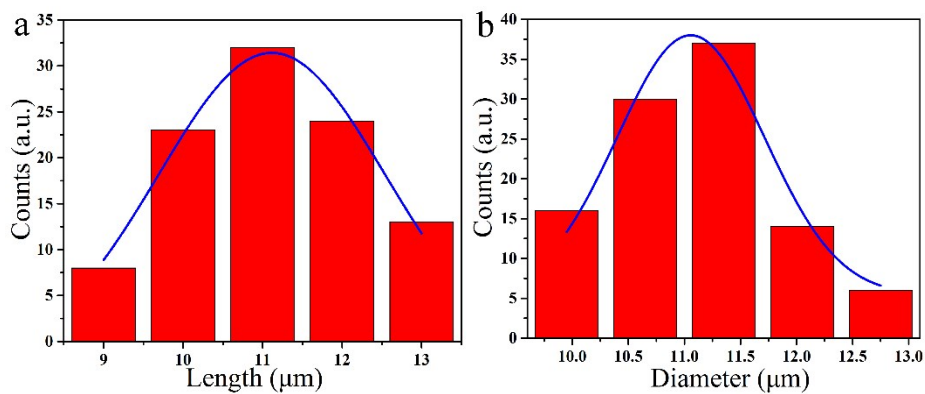

**Fig. S3** Histogram of length (a) and diameter (b) of as-prepared  $\text{Na}_2\text{Si}_{10.5}\text{Ge}_{0.5}\text{F}_6:0.06\text{Mn}^{4+}$  red phosphor

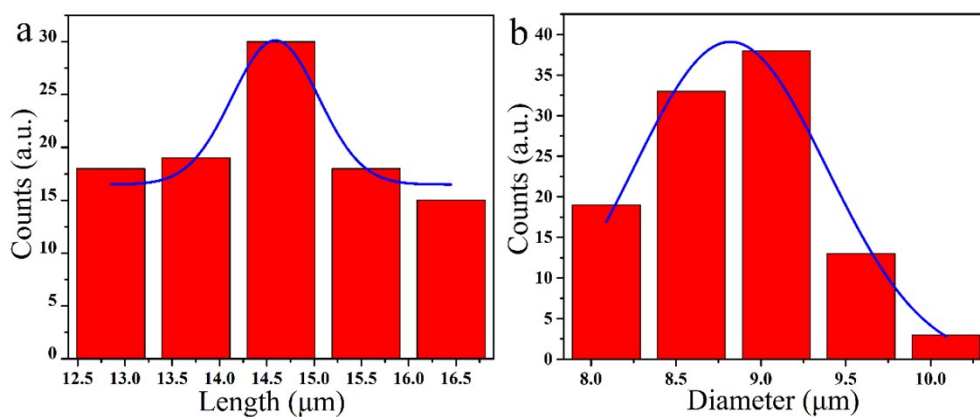

**Fig. S4** Histogram of length (a) and diameter (b) of as-prepared  $\text{Na}_2\text{Si}_{0.3}\text{Ge}_{0.7}\text{F}_6:0.06\text{Mn}^{4+}$  red phosphor

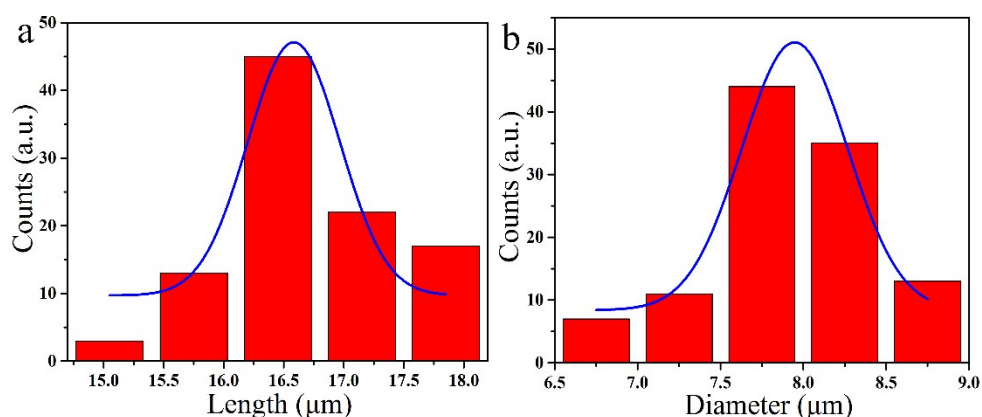

**Fig. S5** Histogram of length (a) and diameter (b) of as-prepared  $\text{Na}_2\text{GeF}_6:0.06\text{Mn}^{4+}$  red phosphor

## References

- [1] A.J. Fu, L.Y. Zhou, S. Wang, Y.H. Li, *Dyes Pigments* 2018, **148**, 9-15.
- [2] S.A. Zhang, Y.H. Hu, H. Duan, L. Chen, Y.R. Fu, G.F. Ju, T. Wang, M. He, *RSC Adv.* 2015, **5**, 90499-90507.
- [3] H.Y. Luo, X.Y. Li, X. Wang, M.Y. Peng, *Chem. Eng. J.* 2020, **384**, 123272.
- [4] J.Q. Chen, C.H. Yang, Y.B. Chen, J. He, Z.Q. Liu, J. Wang, J.L. Zhang, *Inorg. Chem.* 2019, **58**, 8379-8387.
- [5] J.P. Xue, W.G. Ran, H.M. Noh, B.C. Choi, S.H. Park, J.H. Jeong, J.H. Kim, *J. Lumin.* 2017, **192**, 1072-1083.
- [6] S.Y. Wang, Q. Sun, B. Devakumar, L.L. Sun, J. Liang, X.Y. Huang, *RSC Adv.* 2018, **8**, 30191-30200.
- [7] T. Hu, H. Lin, F.L. Lin, Y. Gao, Y. Cheng, J. Xu, Y.S. Wang, *J. Mater. Chem. C* 2018, **6**, 10845-10854.
- [8] L.Q. Xi, Y.X. Pan, M.M. Zhu, H.Z. Lian, J. Lin, *Dalton Trans.* 2017, **46**, 13835-13844.
- [9] Y. Chen, Z.F. Yang, Q. Wang, M.Z. Rong, Q. Zhou, Z.L. Wang, *Dalton Trans.* 2019, **48**, 10901-10906.
- [10] S.Q. Fang, T. Han, T.C. Lang, Y. Zhong, B.T. Liu, S.X. Cao, L.L. Peng, A.N. Yakovlev, V.I. Korepanov, *J. Alloys Compd.* 2019, **808**, 151697.
